# Supplementary material
Source: MDPI journal article supplement (https://www.mdpi.com/2227-9717/10/8/1554)
Supplement: s1 [file s1]

# Diffusion Coefficients in Systems Related to Reservoir Fluids: Available Data and Evaluation of Correlations

Yibo Yang <sup>1</sup>, Erling H. Stenby <sup>1</sup>, Alexander A. Shapiro <sup>2</sup>, and Wei Yan <sup>1,\*</sup>

<sup>1</sup> Center for Energy Resources Engineering, Department of Chemistry, Technical University of Denmark

<sup>2</sup> Center for Energy Resources Engineering, Department of Chemical Engineering, Technical University of Denmark

\* Correspondence: weya@kemi.dtu.dk; Tel.: +45 45252379

We provide some supplementary figures to the manuscript. Figures S1-S4 are about the data trends in N<sub>2</sub>-C<sub>n</sub>, C<sub>2</sub>-C<sub>n</sub>, C<sub>3</sub>-C<sub>n</sub>, C<sub>4</sub>-C<sub>n</sub>, and C<sub>10</sub>/C<sub>12</sub>/C<sub>14</sub>/C<sub>16</sub>-C<sub>n</sub>. Figures S5-S8 are the results including the C<sub>1</sub>-C<sub>10</sub> data from Dysthe et al. (1995). They correspond to Figures 10, 11, 12, and 16 in the manuscript.

In addition, we provide Table S1 that provides the detailed AAD% for different binary mixtures using various correlations. Table S1 corresponds to the base case calculation discussed in “Whole concentration range” in Section 5.2.

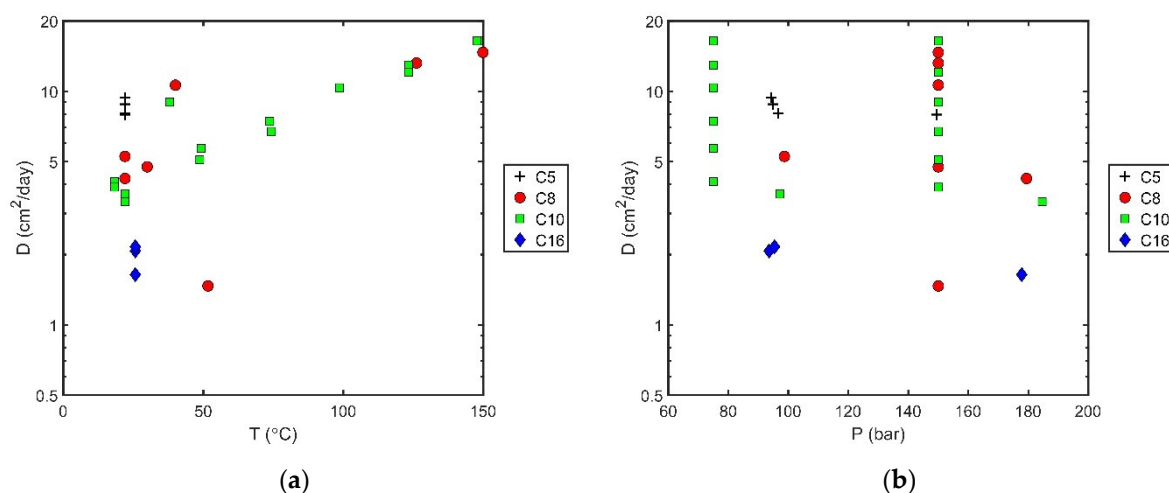

**Figure S1.** Liquid-phase diffusion coefficients for N<sub>2</sub>-C<sub>n</sub> systems: (a) Temperature dependence; (b) Pressure dependence.

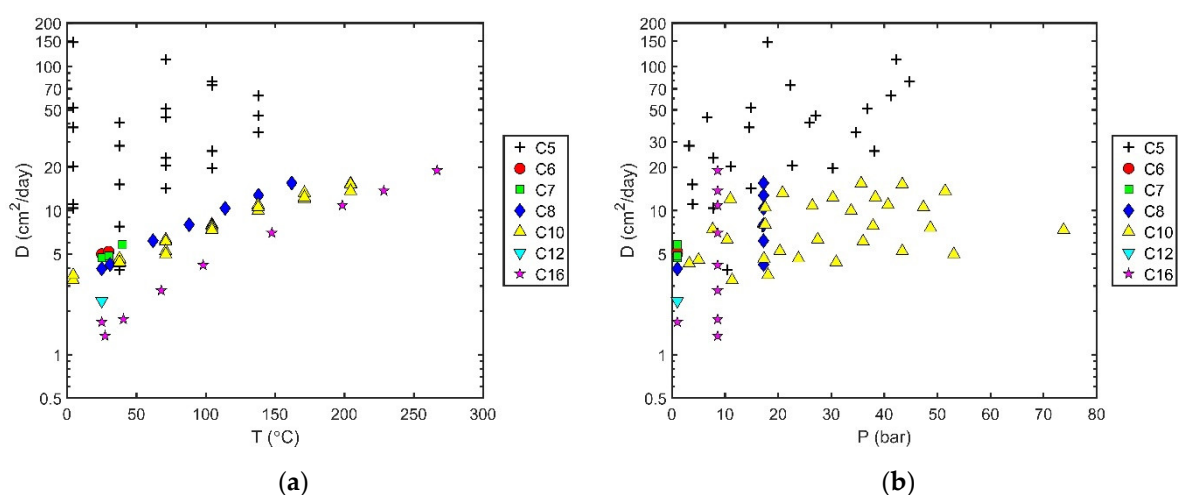

**Figure S2.** Liquid-phase diffusion coefficients for C<sub>2</sub>-C<sub>n</sub> systems: (a) Temperature dependence; (b) Pressure dependence.

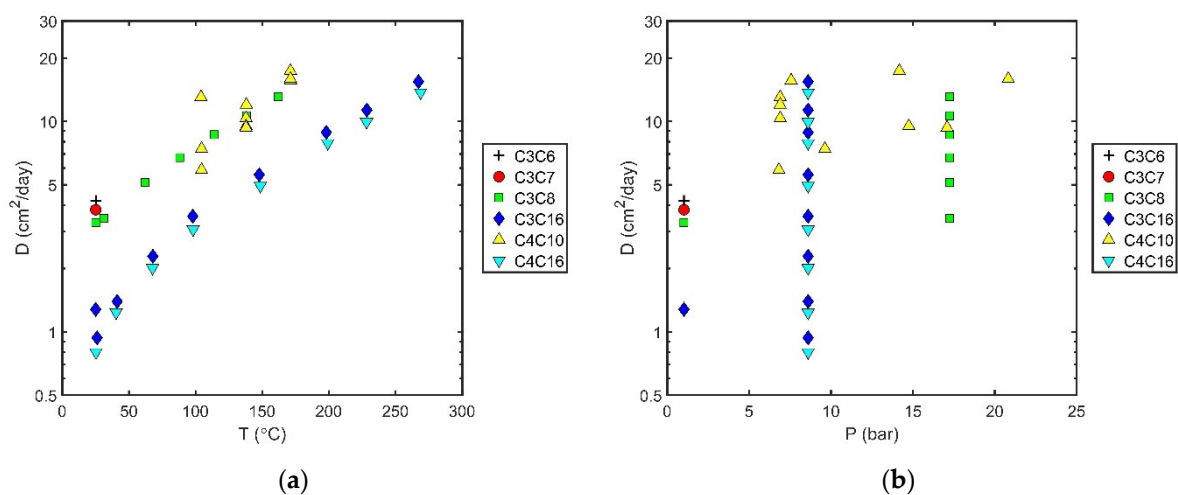

**Figure S3.** Liquid-phase diffusion coefficients for C<sub>3</sub>/C<sub>4</sub>-C<sub>n</sub> systems: (a) Temperature dependence; (b) Pressure dependence.

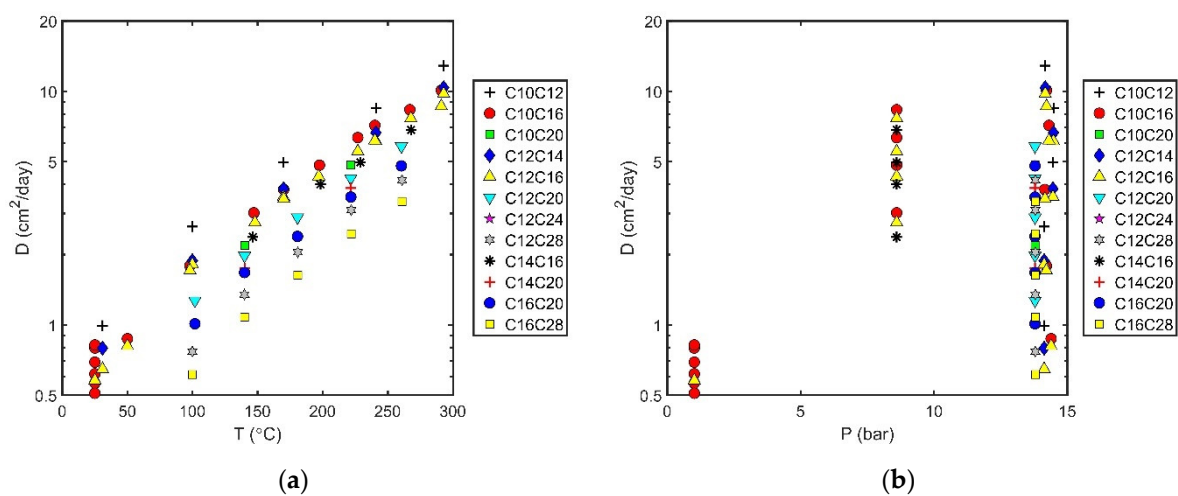

**Figure S4.** Liquid-phase diffusion coefficients for C<sub>10</sub>/C<sub>12</sub>/C<sub>14</sub>/C<sub>16</sub>-C<sub>n</sub> systems: (a) Temperature dependence; (b) Pressure dependence.

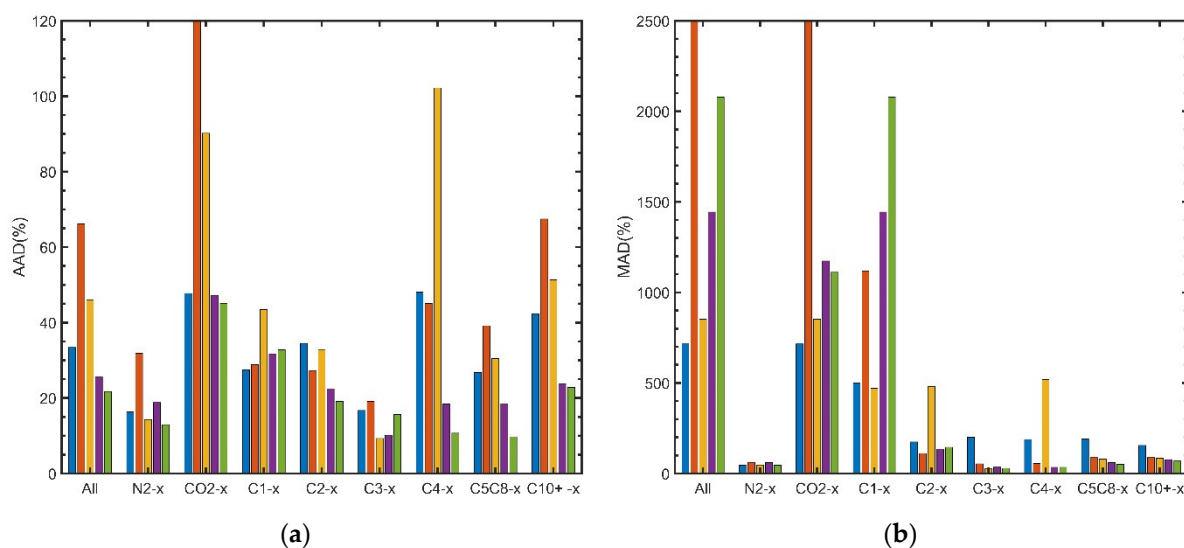

**Figure S5.** Deviations for the base case calculation using different correlations: (a) AAD%; (b) MAD% (blue for ES; red for RW; yellow for LF; purple for WC; green for HM). Corresponding to Figure 10.

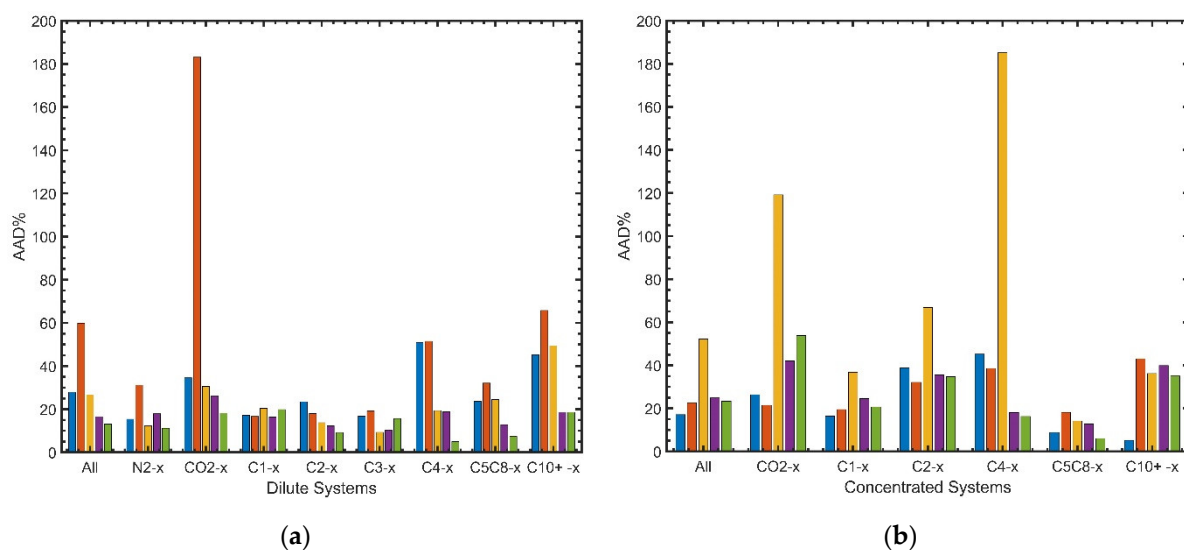

**Figure S6.** Deviations for the base case: (a) dilute concentration range; (b) concentrated systems (blue for ES; red for RW; yellow for LF; purple for WC; green for HM). Corresponding to Figure 11.

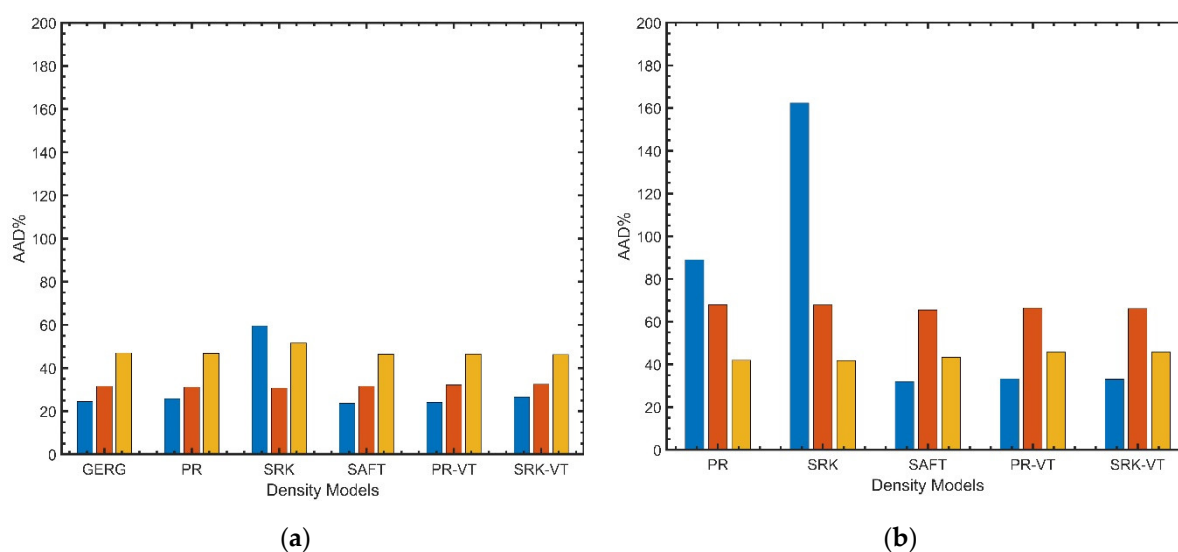

**Figure S7.** Deviations for (a) 32 "GERG systems" and (b) all 72 systems with different density models (blue for ES; red for RW; yellow for LF). Corresponding to Figure 12.

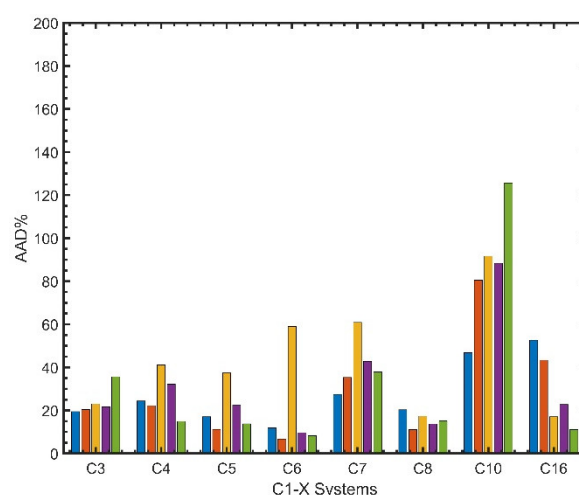

**Figure S8.** Deviations for C<sub>1</sub>-X systems with default settings. Corresponding to Figure 16(a).

**Table S1.** AAD% in diffusion coefficients calculated by different correlations (base case calculation).

| System                           | Np* | ES   | RW   | LDF   | WC    | HM   |
|----------------------------------|-----|------|------|-------|-------|------|
| N <sub>2</sub> -C <sub>8</sub>   | 5   | 12.3 | 29.6 | 12.9  | 15.7  | 10.8 |
| N <sub>2</sub> -C <sub>10</sub>  | 12  | 18.5 | 32.8 | 11.9  | 20.0  | 11.6 |
| CO <sub>2</sub> -C <sub>5</sub>  | 14  | 31.9 | 64.9 | 250.6 | 109.6 | 96.5 |
| CO <sub>2</sub> -C <sub>6</sub>  | 21  | 25.2 | 56.2 | 13.2  | 17.9  | 12.4 |
| CO <sub>2</sub> -C <sub>7</sub>  | 85  | 76.1 | 66.3 | 70.3  | 85.2  | 80.4 |
| CO <sub>2</sub> -C <sub>8</sub>  | 45  | 25.7 | 48.6 | 57.5  | 26.1  | 26.0 |
| CO <sub>2</sub> -C <sub>9</sub>  | 5   | 56.3 | 63.3 | 49.5  | 37.5  | 30.7 |
| CO <sub>2</sub> -C <sub>10</sub> | 36  | 35.9 | 39.2 | 107.7 | 37.5  | 43.2 |
| CO <sub>2</sub> -C <sub>11</sub> | 5   | 54.1 | 64.2 | 48.3  | 42.0  | 35.6 |
| CO <sub>2</sub> -C <sub>12</sub> | 29  | 27.9 | 51.1 | 31.3  | 29.2  | 11.2 |

|                                  |    |      |        |       |      |       |
|----------------------------------|----|------|--------|-------|------|-------|
| CO <sub>2</sub> -C <sub>14</sub> | 29 | 55.8 | 38.5   | 251.8 | 77.2 | 140.9 |
| CO <sub>2</sub> -C <sub>16</sub> | 73 | 55.4 | 1668.8 | 68.0  | 49.0 | 39.2  |
| CO <sub>2</sub> -C <sub>20</sub> | 5  | 48.6 | 75.6   | 55.5  | 19.8 | 7.0   |
| CO <sub>2</sub> -C <sub>28</sub> | 5  | 79.9 | 89.4   | 78.5  | 35.7 | 18.6  |
| C <sub>1</sub> -C <sub>3</sub>   | 22 | 19.5 | 20.4   | 23.0  | 21.7 | 35.7  |
| C <sub>1</sub> -C <sub>4</sub>   | 19 | 24.4 | 22.2   | 41.1  | 32.2 | 14.9  |
| C <sub>1</sub> -C <sub>5</sub>   | 42 | 17.0 | 11.2   | 37.4  | 22.4 | 13.8  |
| C <sub>1</sub> -C <sub>6</sub>   | 1  | 11.9 | 6.7    | 59.1  | 9.7  | 8.3   |
| C <sub>1</sub> -C <sub>7</sub>   | 56 | 27.4 | 35.3   | 60.9  | 42.9 | 37.9  |
| C <sub>1</sub> -C <sub>8</sub>   | 12 | 20.3 | 11.1   | 17.3  | 13.7 | 15.2  |
| C <sub>1</sub> -C <sub>10</sub>  | 49 | 30.3 | 47.7   | 103.1 | 39.2 | 48.4  |
| C <sub>1</sub> -C <sub>16</sub>  | 8  | 52.6 | 43.3   | 17.1  | 22.8 | 11.1  |
| C <sub>2</sub> -C <sub>5</sub>   | 26 | 65.5 | 64.5   | 79.2  | 60.2 | 61.5  |
| C <sub>2</sub> -C <sub>6</sub>   | 2  | 18.7 | 15.8   | 23.5  | 10.2 | 23.3  |
| C <sub>2</sub> -C <sub>7</sub>   | 3  | 6.4  | 3.1    | 12.9  | 2.9  | 10.5  |
| C <sub>2</sub> -C <sub>8</sub>   | 7  | 7.5  | 14.4   | 10.1  | 6.2  | 4.5   |
| C <sub>2</sub> -C <sub>10</sub>  | 30 | 27.2 | 19.7   | 74.5  | 29.3 | 23.0  |
| C <sub>2</sub> -C <sub>12</sub>  | 1  | 59.1 | 25.6   | 17.2  | 25.4 | 6.7   |
| C <sub>2</sub> -C <sub>16</sub>  | 9  | 57.0 | 47.1   | 12.6  | 23.0 | 4.3   |
| C <sub>3</sub> -C <sub>6</sub>   | 1  | 5.7  | 6.9    | 5.6   | 11.4 | 28.6  |
| C <sub>3</sub> -C <sub>7</sub>   | 1  | 0.8  | 1.0    | 8.3   | 3.5  | 21.1  |
| C <sub>3</sub> -C <sub>8</sub>   | 7  | 5.3  | 20.9   | 7.0   | 5.2  | 7.5   |
| C <sub>3</sub> -C <sub>16</sub>  | 9  | 55.0 | 47.8   | 16.3  | 20.6 | 5.5   |
| C <sub>4</sub> -C <sub>10</sub>  | 8  | 45.2 | 38.6   | 185.1 | 18.1 | 16.3  |
| C <sub>4</sub> -C <sub>16</sub>  | 8  | 50.9 | 51.5   | 19.3  | 18.7 | 5.1   |
| C <sub>5</sub> -C <sub>6</sub>   | 1  | 19.4 | 23.2   | 29.3  | 15.5 | 1.2   |
| C <sub>5</sub> -C <sub>8</sub>   | 6  | 14.7 | 33.1   | 9.2   | 6.6  | 1.8   |
| C <sub>5</sub> -C <sub>16</sub>  | 8  | 51.8 | 53.2   | 22.9  | 16.9 | 6.0   |
| C <sub>6</sub> -C <sub>7</sub>   | 40 | 18.8 | 25.3   | 28.4  | 12.3 | 2.6   |
| C <sub>6</sub> -C <sub>8</sub>   | 31 | 16.9 | 25.2   | 26.0  | 11.9 | 5.4   |
| C <sub>6</sub> -C <sub>10</sub>  | 1  | 24.5 | 28.0   | 33.4  | 15.0 | 3.0   |
| C <sub>6</sub> -C <sub>12</sub>  | 39 | 27.6 | 32.0   | 26.6  | 21.2 | 8.6   |
| C <sub>6</sub> -C <sub>16</sub>  | 11 | 47.0 | 40.0   | 31.9  | 33.7 | 18.6  |
| C <sub>6</sub> -C <sub>18</sub>  | 1  | 22.3 | 29.7   | 34.1  | 10.0 | 1.4   |
| C <sub>6</sub> -C <sub>24</sub>  | 1  | 23.4 | 30.4   | 32.5  | 12.4 | 4.9   |
| C <sub>6</sub> -C <sub>32</sub>  | 1  | 30.4 | 38.6   | 35.8  | 27.5 | 20.5  |
| C <sub>7</sub> -C <sub>8</sub>   | 45 | 15.3 | 28.9   | 23.4  | 9.6  | 3.3   |
| C <sub>7</sub> -C <sub>10</sub>  | 26 | 17.1 | 32.6   | 26.5  | 18.9 | 7.5   |
| C <sub>7</sub> -C <sub>12</sub>  | 33 | 18.8 | 31.4   | 22.1  | 16.8 | 9.9   |
| C <sub>7</sub> -C <sub>14</sub>  | 29 | 30.8 | 36.1   | 24.9  | 25.6 | 13.0  |
| C <sub>7</sub> -C <sub>16</sub>  | 18 | 31.1 | 40.8   | 25.0  | 18.7 | 10.5  |
| C <sub>7</sub> -C <sub>18</sub>  | 1  | 3.6  | 48.8   | 31.7  | 32.5 | 6.0   |
| C <sub>8</sub> -C <sub>10</sub>  | 6  | 24.0 | 40.5   | 14.1  | 9.4  | 4.3   |
| C <sub>8</sub> -C <sub>12</sub>  | 36 | 19.1 | 37.8   | 23.0  | 14.8 | 7.3   |
| C <sub>8</sub> -C <sub>14</sub>  | 30 | 30.5 | 37.4   | 24.5  | 22.9 | 11.2  |
| C <sub>8</sub> -C <sub>16</sub>  | 16 | 35.7 | 54.1   | 34.6  | 15.9 | 7.9   |

|                                   |      |      |       |       |      |      |
|-----------------------------------|------|------|-------|-------|------|------|
| C <sub>8</sub> -C <sub>20</sub>   | 5    | 42.6 | 73.0  | 53.0  | 18.1 | 21.3 |
| C <sub>8</sub> -C <sub>24</sub>   | 1    | 13.7 | 34.7  | 34.5  | 19.6 | 13.3 |
| C <sub>8</sub> -C <sub>28</sub>   | 5    | 74.5 | 86.9  | 76.6  | 35.8 | 36.9 |
| C <sub>8</sub> -C <sub>32</sub>   | 1    | 15.1 | 37.5  | 37.5  | 21.2 | 16.9 |
| C <sub>10</sub> -C <sub>12</sub>  | 5    | 26.4 | 47.9  | 24.0  | 16.7 | 7.7  |
| C <sub>10</sub> -C <sub>16</sub>  | 20   | 56.6 | 49.2  | 32.2  | 17.4 | 7.6  |
| C <sub>10</sub> -C <sub>20</sub>  | 2    | 45.0 | 73.3  | 54.6  | 17.3 | 22.3 |
| C <sub>12</sub> -C <sub>14</sub>  | 5    | 25.4 | 48.1  | 24.8  | 16.8 | 6.2  |
| C <sub>12</sub> -C <sub>16</sub>  | 16   | 40.2 | 54.3  | 34.0  | 14.9 | 8.5  |
| C <sub>12</sub> -C <sub>20</sub>  | 5    | 43.4 | 73.5  | 56.9  | 17.4 | 23.8 |
| C <sub>12</sub> -C <sub>24</sub>  | 1    | 0.4  | 79.8  | 68.1  | 75.9 | 68.7 |
| C <sub>12</sub> -C <sub>28</sub>  | 5    | 74.1 | 86.7  | 79.3  | 33.7 | 38.1 |
| C <sub>14</sub> -C <sub>16</sub>  | 9    | 31.3 | 61.5  | 41.9  | 14.2 | 9.3  |
| C <sub>14</sub> -C <sub>20</sub>  | 2    | 46.5 | 74.0  | 58.4  | 14.9 | 22.5 |
| C <sub>16</sub> -C <sub>20</sub>  | 5    | 44.8 | 74.3  | 60.5  | 15.8 | 23.4 |
| C <sub>16</sub> -C <sub>28</sub>  | 5    | 73.9 | 86.6  | 81.4  | 29.3 | 36.1 |
| Summary                           |      |      |       |       |      |      |
| All                               | 1162 | 33.2 | 65.7  | 46.0  | 24.8 | 20.6 |
| N <sub>2</sub> -X                 | 17   | 15.4 | 31.2  | 12.4  | 17.9 | 11.2 |
| CO <sub>2</sub> -X                | 352  | 47.7 | 193.8 | 90.2  | 47.2 | 45.1 |
| C <sub>1</sub> -X                 | 209  | 25.4 | 24.7  | 44.9  | 25.6 | 23.1 |
| C <sub>2</sub> -X                 | 78   | 34.5 | 27.2  | 32.9  | 22.5 | 19.1 |
| C <sub>3</sub> -X                 | 18   | 16.7 | 19.1  | 9.3   | 10.2 | 15.7 |
| C <sub>4</sub> -X                 | 16   | 48.1 | 45.1  | 102.2 | 18.4 | 10.7 |
| C <sub>5</sub> -C <sub>8</sub> -X | 392  | 26.7 | 39.1  | 30.5  | 18.5 | 9.7  |
| C <sub>10+</sub> -X               | 80   | 42.3 | 67.4  | 51.3  | 23.7 | 22.8 |

\* Np is the number of the liquid-phase diffusion coefficients with the composition information.

## Reference

Dysthe, D.; Hafskjold, B. Inter-and Intradiffusion in Liquid Mixtures of Methane and n-Decane. *International journal of thermophysics* **1995**, *16*, 1213–1224.
